# Supplementary material for: Diclofenac Ion Hydration: Experimental and Theoretical Search for Anion Pairs
Source: MDPI journal article supplement (doi:10.3390/molecules27103350), 2022-05-23
Supplement: s1 [file s1]

*Supplementary Materials*

# Diclofenac Ion Hydration: Experimental and Theoretical Search for Anion Pairs

Anastasia V. Shishkina <sup>1</sup>, Alexander A. Ksenofontov <sup>2,3</sup>, Nikita V. Penkov <sup>4</sup> and Mikhail V. Vener <sup>5,\*</sup>

<sup>1</sup> Department of Physics and Engineering Environmental Protection, Northern (Arctic) Federal University, 163001 Arkhangelsk, Russia; a.shishkina@narfu.ru

<sup>2</sup> G.A. Krestov Institute of Solution Chemistry RAS, 153045 Ivanovo, Russia; kaa@isc-ras.ru

<sup>3</sup> Biologically Active Terpenoids Laboratory, Kazan Federal University, 18 Kremlevskaya Street, 420008 Kazan, Russia

<sup>4</sup> Federal Research Center “Pushchino Scientific Center for Biological Research of the Russian Academy of Sciences”, Institute of Cell Biophysics RAS, 142290 Pushchino, Russia; nvpenkov@psn.ru

<sup>5</sup> Kurnakov Institute of General and Inorganic Chemistry RAS, Leninskii Prosp. 31, 119991 Moscow, Russia

\* Correspondence: vener@igic.ras.ru

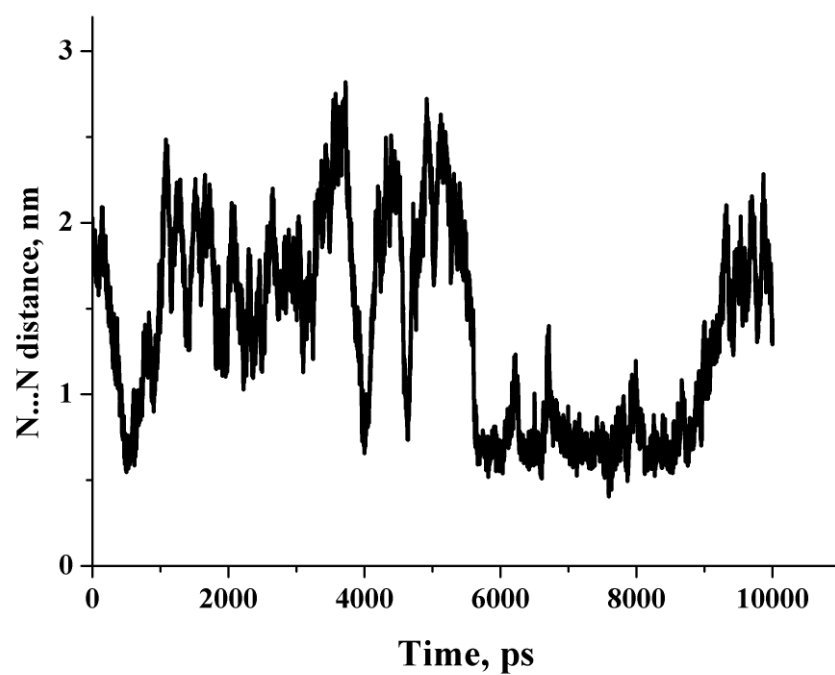

**Figure S1.** The distance between the nitrogen atoms of DN anions during the 100 ns NVT simulations.

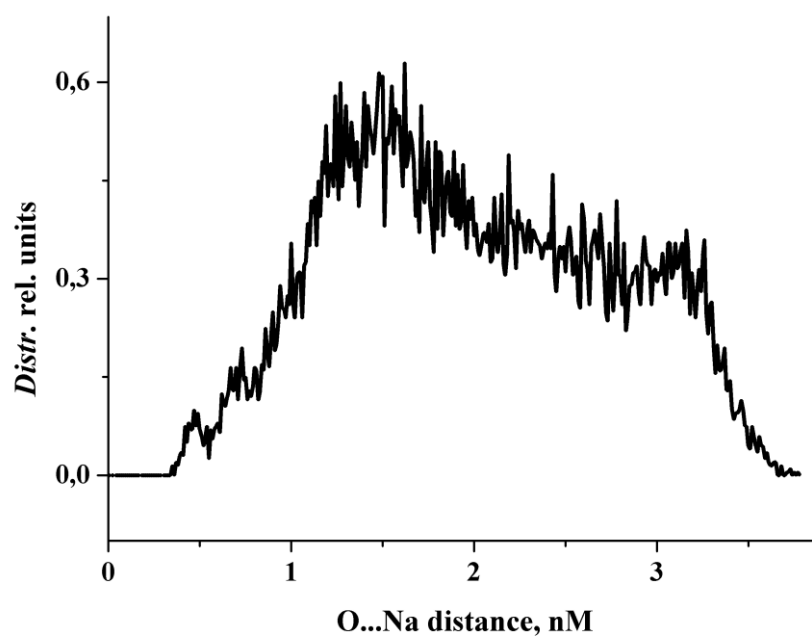

**Figure S2.** Na<sup>+</sup>...OCO<sup>-</sup> distribution function  $g(r)$  obtained from the 100 ns NVT simulations, where OCO<sup>-</sup> stands for the carboxylate group of the diclofenac anion.

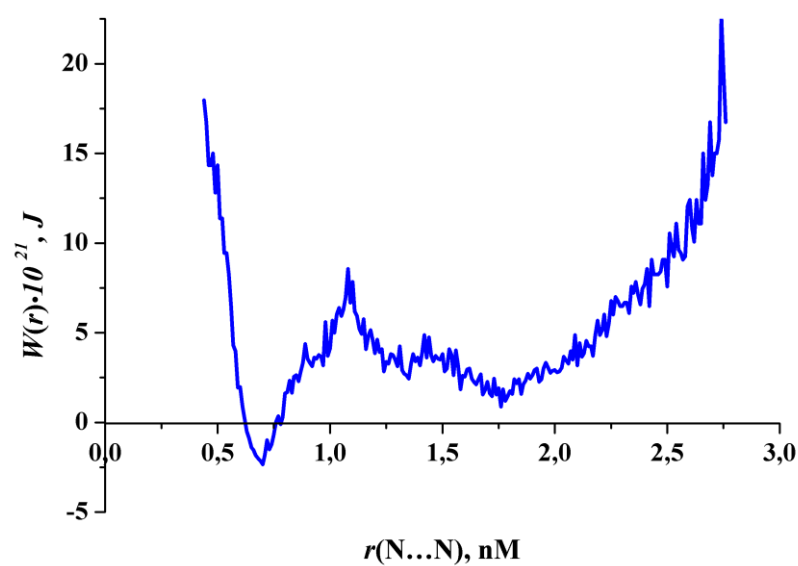

**Figure S3.** The classical potential of mean force  $W(r)$  of the N...N distribution function. The reaction coordinate corresponds to the distance separating the nitrogen atoms  $r(\text{N}\dots\text{N})$  of the DN anions.

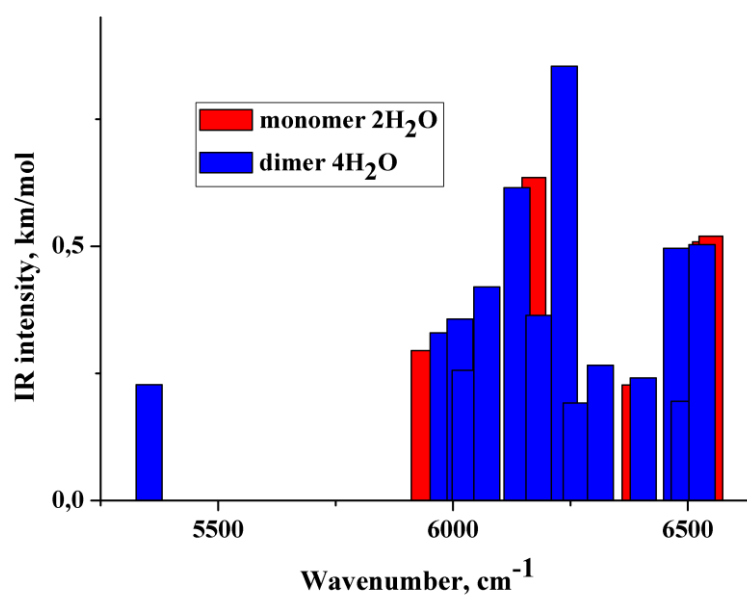

**Figure S4.** Theoretical NIR spectra of the diclofenac anion hydrated with two water molecules (red sticks) and dimer of the diclofenac anion hydrated by four water molecules (blue sticks). Vibrations having relative IR intensities less than 0.20 are not reported.

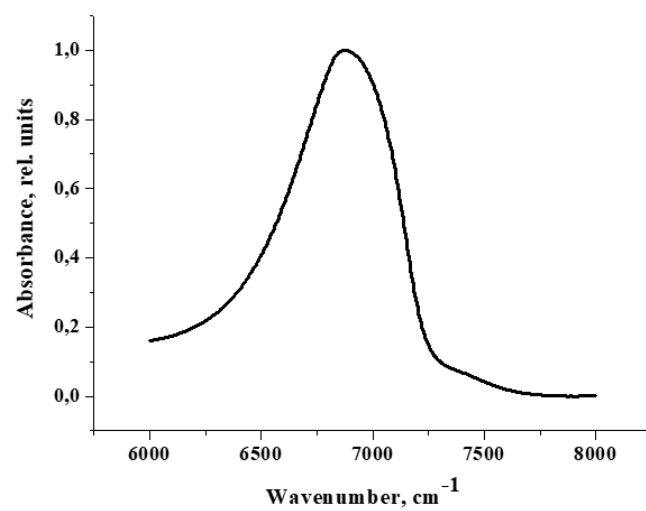

**Figure S5.** NIR spectrum of NaDN mixed with HD-NaDN.

**Table S1.** NTOs analysis for monomer (anion diclofenac·3H<sub>2</sub>O) and its dimer.

| State                                        | Transition Nature | NTO Eigenvalue |
|----------------------------------------------|-------------------|----------------|
| monomer (anion diclofenac·3H <sub>2</sub> O) |                   |                |
| 1                                            | H—L               | 0.97           |
| 9                                            | H—L               | 0.73           |
|                                              | H-1—L+1           | 0.22           |
| 10                                           | H—L               | 0.64           |
|                                              | H-1—L+1           | 0.19           |
|                                              | H-2—L+2           | 0.11           |
| 11                                           | H—L               | 0.66           |
|                                              | H-1—L+1           | 0.15           |
|                                              | H-2—L+2           | 0.10           |
| 13                                           | H—L               | 0.41           |
|                                              | H-1—L+1           | 0.26           |
|                                              | H-2—L+2           | 0.18           |
| 14                                           | H—L               | 0.67           |
|                                              | H-1—L+1           | 0.29           |
| 15                                           | H—L               | 0.61           |
|                                              | H-1—L+1           | 0.27           |
| 17                                           | H—L               | 0.57           |
|                                              | H-1—L+1           | 0.26           |
| 25                                           | H—L               | 0.66           |
|                                              | H-1—L+1           | 0.27           |
| dimer                                        |                   |                |
| 1                                            | H—L               | 0.88           |
| 2                                            | H—L               | 0.87           |
| 21                                           | H—L               | 0.40           |
|                                              | H-1—L+1           | 0.33           |
|                                              | H-2—L+2           | 0.13           |
| 22                                           | H—L               | 0.38           |
|                                              | H-1—L+1           | 0.31           |
|                                              | H-2—L+2           | 0.13           |
| 24                                           | H—L               | 0.42           |
|                                              | H-1—L+1           | 0.25           |

**Table S2.** Visualization of hole and particle NTOs of monomer (anion diclofenac-3H<sub>2</sub>O) and its dimer.

| State | Molecular Orbitals                                                                  |                                                                                       |
|-------|-------------------------------------------------------------------------------------|---------------------------------------------------------------------------------------|
| 1     | 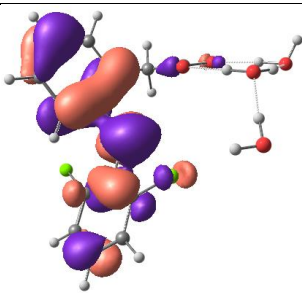   |    |
|       | H                                                                                   | L                                                                                     |
| 9     |    |    |
|       | H-1                                                                                 | H                                                                                     |
|       |   |   |
|       | L                                                                                   | L+1                                                                                   |
| 10    |  |  |
|       | H-2                                                                                 | H-1                                                                                   |
|       |  |  |
|       | H                                                                                   | L                                                                                     |

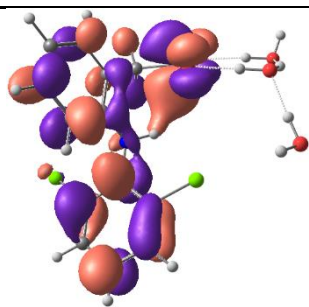

L+1

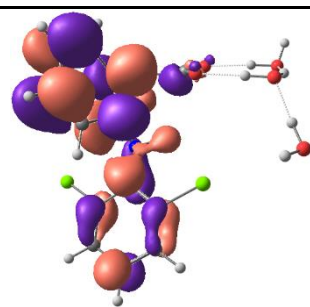

L+2

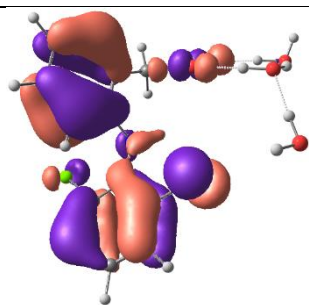

H-2

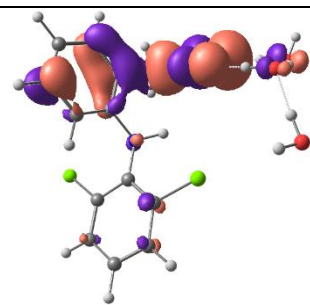

H-1

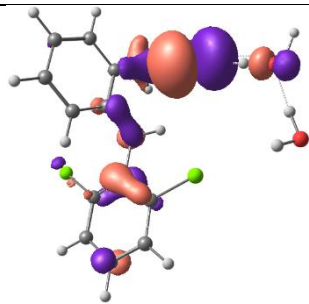

H

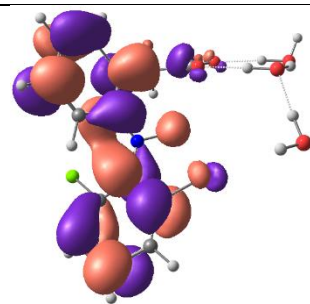

L

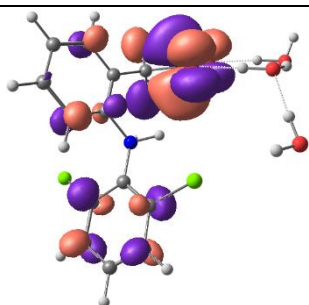

L+1

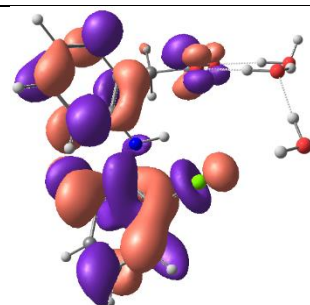

L+2

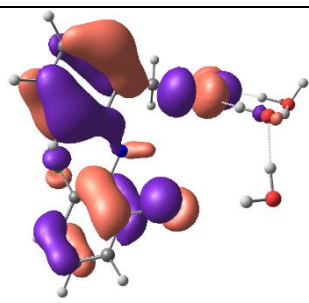

H-2

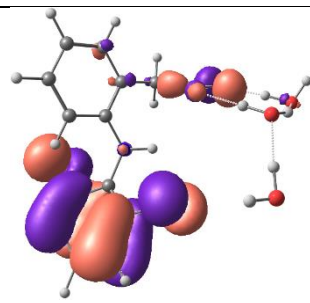

H-1

11

13

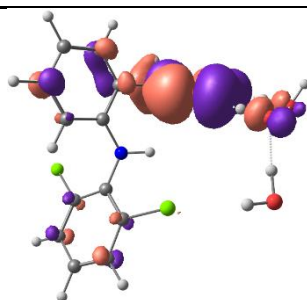

H

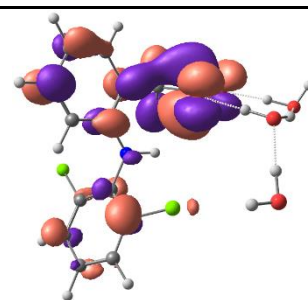

L

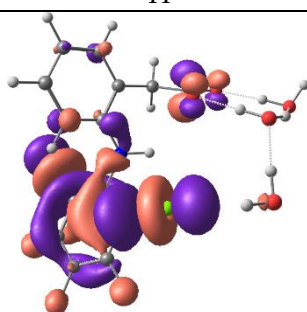

L+1

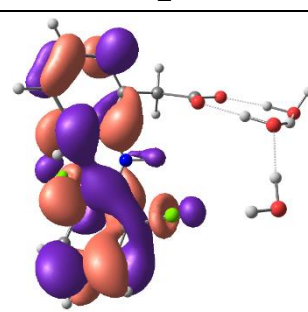

L+2

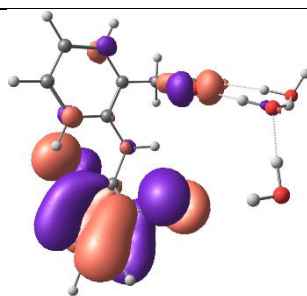

H-1

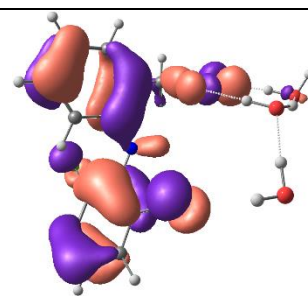

H

14

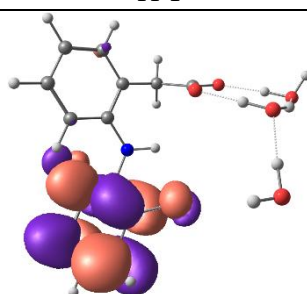

L

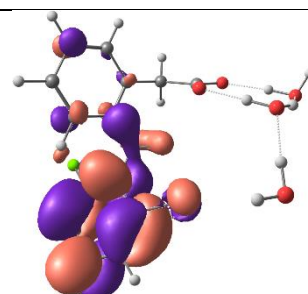

L+1

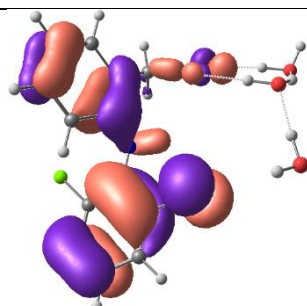

H-1

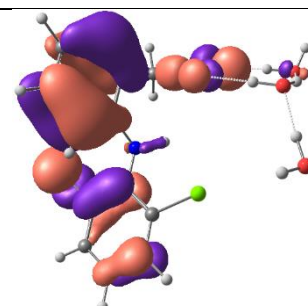

H

15



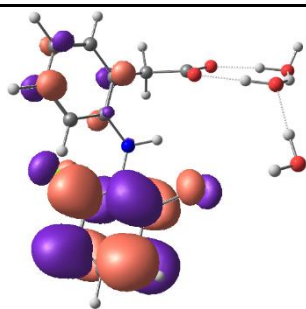

L

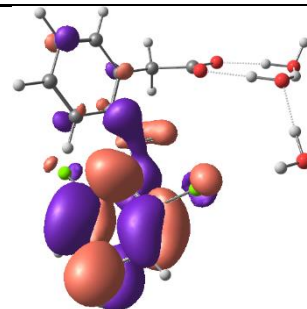

L+1

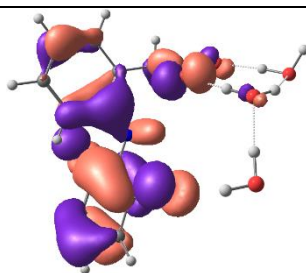

H-1

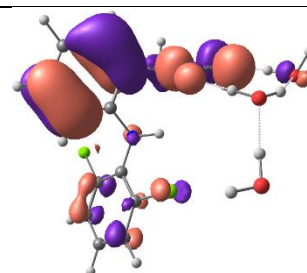

H

17

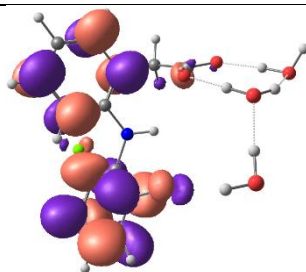

L

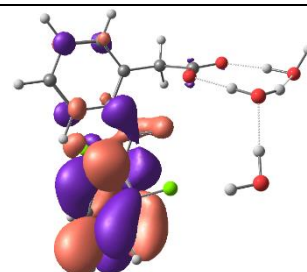

L+1

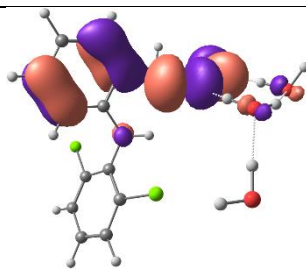

H-1

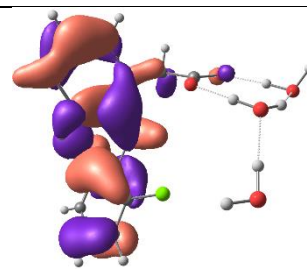

H

25

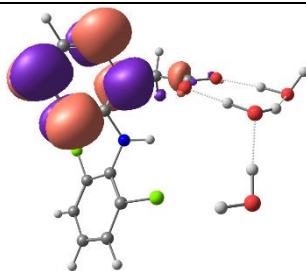

L

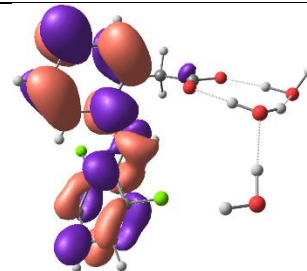

L+1

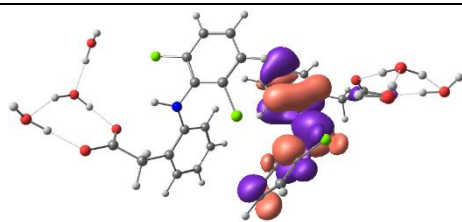

H

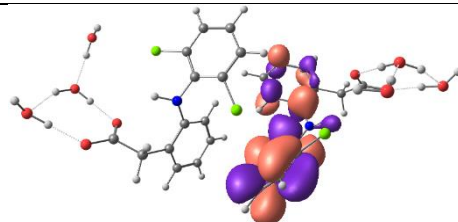

L

1

A 3D molecular model of a complex organic molecule, likely a nucleoside or nucleotide derivative. The structure features a central core with several large, semi-transparent red and blue isosurfaces, possibly representing electron density or electrostatic potential. The molecule is composed of various atoms, including carbon (grey), oxygen (red), nitrogen (blue), and sulfur (yellow), connected by bonds. The overall shape is elongated and somewhat symmetrical.

A 3D ball-and-stick model of a complex organic molecule. The structure features a central benzene ring substituted with various functional groups, including a carboxylic acid group, a nitrile group, and a complex heterocyclic system. Large red and blue isosurfaces are overlaid on the model, representing the electron density of the molecule. The atoms are color-coded: carbon (grey), oxygen (red), nitrogen (blue), and sulfur (yellow).



10

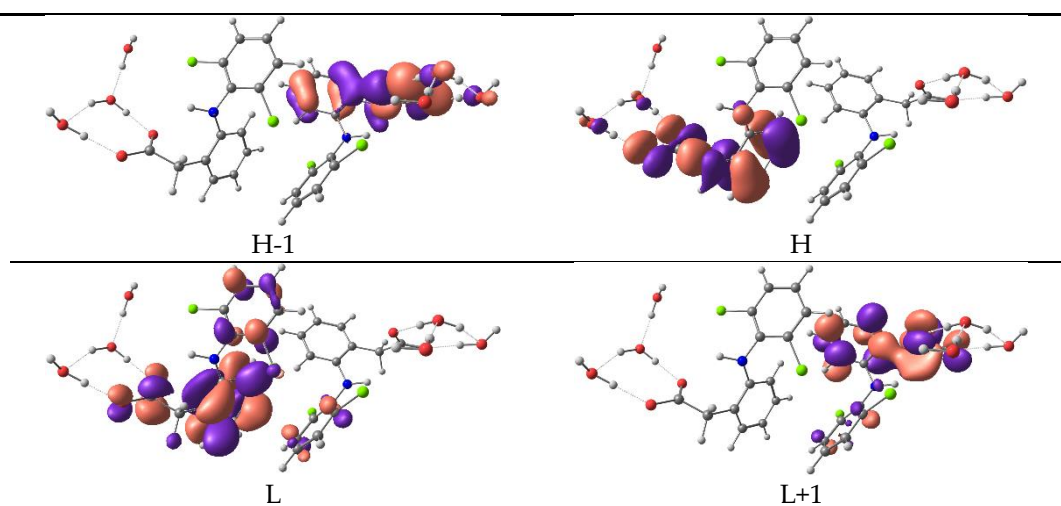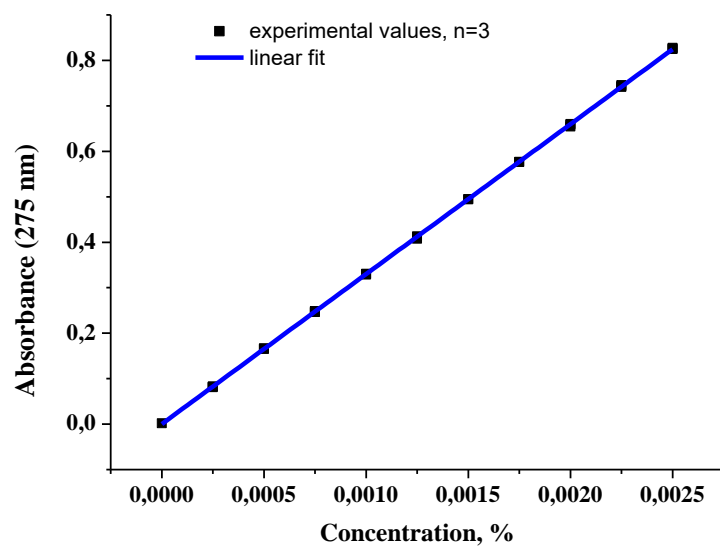

**Figure S6.** The concentration dependence of the optical density normalized to the cuvette thickness of an aqueous solution of diclofenac sodium at a wavelength 275 nm. The values obtained in the experiment and linear fit are presented.

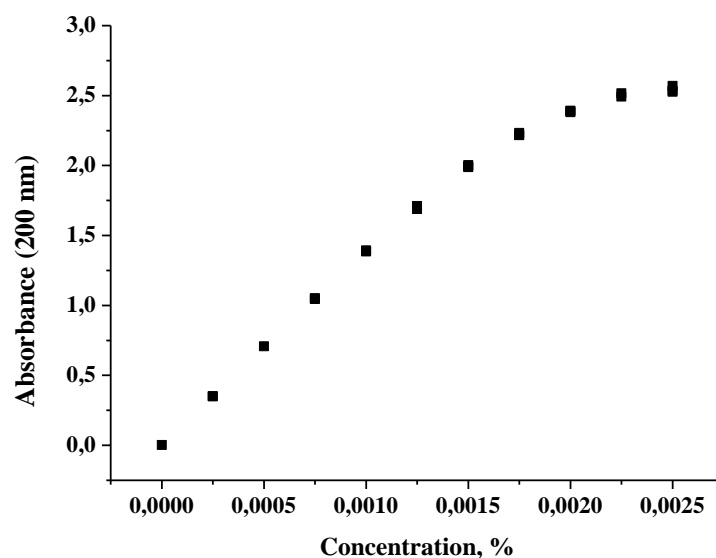

**Figure S7.** The concentration dependence of the optical density normalized to the cuvette thickness of an aqueous solution of diclofenac sodium at a wavelength 200 nm. Optical densities obtained at concentrations greater than 0.002% must be interpreted with care.

Section S1. Topological file of the DN-anion.

; GENERATED BY LigParGen Server

; Jorgensen Lab @ Yale University

;

[ moleculetype ]

; Name nrexcl

UNK 3

[ atoms ]

| ; nr | type     | resnr | residue | atom | cgnr | charge  | mass    |
|------|----------|-------|---------|------|------|---------|---------|
| 1    | opls_800 | 1     | UNK     | O00  | 1    | -0.6139 | 15.9990 |
| 2    | opls_801 | 1     | UNK     | C01  | 1    | 0.4329  | 12.0110 |
| 3    | opls_802 | 1     | UNK     | O02  | 1    | -0.6139 | 15.9990 |
| 4    | opls_803 | 1     | UNK     | C03  | 1    | -0.2153 | 12.0110 |
| 5    | opls_804 | 1     | UNK     | C04  | 1    | -0.0287 | 12.0110 |

|    |          |   |     |     |   |         |         |
|----|----------|---|-----|-----|---|---------|---------|
| 6  | opls_805 | 1 | UNK | C05 | 1 | -0.1288 | 12.0110 |
| 7  | opls_806 | 1 | UNK | C06 | 1 | -0.1343 | 12.0110 |
| 8  | opls_807 | 1 | UNK | C07 | 1 | -0.1635 | 12.0110 |
| 9  | opls_808 | 1 | UNK | C08 | 1 | -0.1102 | 12.0110 |
| 10 | opls_809 | 1 | UNK | C09 | 1 | 0.1217  | 12.0110 |
| 11 | opls_810 | 1 | UNK | N0A | 2 | -0.6145 | 14.0070 |
| 12 | opls_811 | 1 | UNK | C0B | 3 | 0.2398  | 12.0110 |
| 13 | opls_812 | 1 | UNK | C0C | 3 | -0.0574 | 12.0110 |
| 14 | opls_813 | 1 | UNK | Cl0 | 3 | -0.0438 | 35.4500 |
| 15 | opls_814 | 1 | UNK | C0E | 3 | -0.0994 | 12.0110 |
| 16 | opls_815 | 1 | UNK | C0F | 3 | -0.1771 | 12.0110 |
| 17 | opls_816 | 1 | UNK | C0G | 3 | -0.1034 | 12.0110 |
| 18 | opls_817 | 1 | UNK | C0H | 3 | -0.0712 | 12.0110 |
| 19 | opls_818 | 1 | UNK | Cl1 | 3 | -0.0605 | 35.4500 |
| 20 | opls_819 | 1 | UNK | H0J | 1 | 0.0780  | 1.0080  |
| 21 | opls_820 | 1 | UNK | H0K | 1 | 0.0780  | 1.0080  |
| 22 | opls_821 | 1 | UNK | H0M | 1 | 0.1361  | 1.0080  |
| 23 | opls_822 | 1 | UNK | H0N | 1 | 0.1113  | 1.0080  |
| 24 | opls_823 | 1 | UNK | H0O | 1 | 0.1116  | 1.0080  |
| 25 | opls_824 | 1 | UNK | H0P | 1 | 0.1238  | 1.0080  |
| 26 | opls_825 | 1 | UNK | H0Q | 2 | 0.4126  | 1.0080  |
| 27 | opls_826 | 1 | UNK | H0R | 3 | 0.1353  | 1.0080  |
| 28 | opls_827 | 1 | UNK | H0S | 3 | 0.1248  | 1.0080  |
| 29 | opls_828 | 1 | UNK | H0T | 3 | 0.1300  | 1.0080  |

[ bonds ]

|   |   |   |                   |
|---|---|---|-------------------|
| 2 | 1 | 1 | 0.1250 548940.800 |
| 3 | 2 | 1 | 0.1250 548940.800 |
| 4 | 2 | 1 | 0.1522 265265.600 |
| 5 | 4 | 1 | 0.1510 265265.600 |

|    |    |   |                   |
|----|----|---|-------------------|
| 6  | 5  | 1 | 0.1400 392459.200 |
| 7  | 6  | 1 | 0.1400 392459.200 |
| 8  | 7  | 1 | 0.1400 392459.200 |
| 9  | 8  | 1 | 0.1400 392459.200 |
| 10 | 5  | 1 | 0.1400 392459.200 |
| 11 | 10 | 1 | 0.1340 402500.800 |
| 12 | 11 | 1 | 0.1340 402500.800 |
| 13 | 12 | 1 | 0.1400 392459.200 |
| 14 | 13 | 1 | 0.1725 251040.000 |
| 15 | 13 | 1 | 0.1400 392459.200 |
| 16 | 15 | 1 | 0.1400 392459.200 |
| 17 | 16 | 1 | 0.1400 392459.200 |
| 18 | 12 | 1 | 0.1400 392459.200 |
| 19 | 18 | 1 | 0.1725 251040.000 |
| 20 | 4  | 1 | 0.1090 284512.000 |
| 21 | 4  | 1 | 0.1090 284512.000 |
| 22 | 6  | 1 | 0.1080 307105.600 |
| 23 | 7  | 1 | 0.1080 307105.600 |
| 24 | 8  | 1 | 0.1080 307105.600 |
| 25 | 9  | 1 | 0.1080 307105.600 |
| 26 | 11 | 1 | 0.1010 363171.200 |
| 27 | 15 | 1 | 0.1080 307105.600 |
| 28 | 16 | 1 | 0.1080 307105.600 |
| 29 | 17 | 1 | 0.1080 307105.600 |
| 10 | 9  | 1 | 0.1400 392459.200 |
| 18 | 17 | 1 | 0.1400 392459.200 |

[ angles ]

|   |    |    |          |    |    |    |    |
|---|----|----|----------|----|----|----|----|
| ; | ai | aj | ak funct | c0 | c1 | c2 | c3 |
|---|----|----|----------|----|----|----|----|

|    |    |    |   |         |         |
|----|----|----|---|---------|---------|
| 1  | 2  | 3  | 1 | 126.000 | 669.440 |
| 1  | 2  | 4  | 1 | 117.000 | 585.760 |
| 2  | 4  | 5  | 1 | 112.000 | 527.184 |
| 4  | 5  | 6  | 1 | 120.000 | 585.760 |
| 5  | 6  | 7  | 1 | 120.000 | 527.184 |
| 6  | 7  | 8  | 1 | 120.000 | 527.184 |
| 7  | 8  | 9  | 1 | 120.000 | 527.184 |
| 4  | 5  | 10 | 1 | 120.000 | 585.760 |
| 5  | 10 | 11 | 1 | 120.000 | 585.760 |
| 10 | 11 | 12 | 1 | 116.000 | 418.400 |
| 11 | 12 | 13 | 1 | 120.000 | 585.760 |
| 12 | 13 | 14 | 1 | 120.000 | 627.600 |
| 12 | 13 | 15 | 1 | 120.000 | 527.184 |
| 13 | 15 | 16 | 1 | 120.000 | 527.184 |
| 15 | 16 | 17 | 1 | 120.000 | 527.184 |
| 11 | 12 | 18 | 1 | 120.000 | 585.760 |
| 12 | 18 | 19 | 1 | 120.000 | 627.600 |
| 2  | 4  | 20 | 1 | 109.500 | 292.880 |
| 2  | 4  | 21 | 1 | 109.500 | 292.880 |
| 5  | 6  | 22 | 1 | 120.000 | 292.880 |
| 6  | 7  | 23 | 1 | 120.000 | 292.880 |
| 7  | 8  | 24 | 1 | 120.000 | 292.880 |
| 8  | 9  | 25 | 1 | 120.000 | 292.880 |
| 10 | 11 | 26 | 1 | 116.000 | 292.880 |
| 13 | 15 | 27 | 1 | 120.000 | 292.880 |
| 15 | 16 | 28 | 1 | 120.000 | 292.880 |
| 16 | 17 | 29 | 1 | 120.000 | 292.880 |
| 18 | 17 | 29 | 1 | 120.000 | 292.880 |
| 16 | 17 | 18 | 1 | 120.000 | 527.184 |

|    |    |    |   |         |         |
|----|----|----|---|---------|---------|
| 7  | 6  | 22 | 1 | 120.000 | 292.880 |
| 6  | 5  | 10 | 1 | 120.000 | 527.184 |
| 12 | 18 | 17 | 1 | 120.000 | 527.184 |
| 5  | 10 | 9  | 1 | 120.000 | 527.184 |
| 17 | 16 | 28 | 1 | 120.000 | 292.880 |
| 14 | 13 | 15 | 1 | 120.000 | 627.600 |
| 12 | 11 | 26 | 1 | 116.000 | 292.880 |
| 16 | 15 | 27 | 1 | 120.000 | 292.880 |
| 8  | 7  | 23 | 1 | 120.000 | 292.880 |
| 3  | 2  | 4  | 1 | 117.000 | 585.760 |
| 10 | 9  | 25 | 1 | 120.000 | 292.880 |
| 17 | 18 | 19 | 1 | 120.000 | 627.600 |
| 5  | 4  | 21 | 1 | 109.500 | 292.880 |
| 5  | 4  | 20 | 1 | 109.500 | 292.880 |
| 9  | 10 | 11 | 1 | 120.000 | 585.760 |
| 8  | 9  | 10 | 1 | 120.000 | 527.184 |
| 20 | 4  | 21 | 1 | 107.800 | 276.144 |
| 13 | 12 | 18 | 1 | 120.000 | 527.184 |
| 9  | 8  | 24 | 1 | 120.000 | 292.880 |

[ dihedrals ]

; IMPROPER DIHEDRAL ANGLES

|    | ai | aj | ak | al | funct | c0      | c1     | c2 | c3 | c4 |
|----|----|----|----|----|-------|---------|--------|----|----|----|
| c5 |    |    |    |    |       |         |        |    |    |    |
|    | 15 | 13 | 12 | 14 | 4     | 180.000 | 10.460 | 2  |    |    |
|    | 10 | 5  | 4  | 6  | 4     | 180.000 | 10.460 | 2  |    |    |
|    | 18 | 12 | 11 | 13 | 4     | 180.000 | 10.460 | 2  |    |    |
|    | 4  | 2  | 1  | 3  | 4     | 180.000 | 43.932 | 2  |    |    |
|    | 19 | 18 | 12 | 17 | 4     | 180.000 | 10.460 | 2  |    |    |



|    |    |    |    |   |         |        |   |
|----|----|----|----|---|---------|--------|---|
| 22 | 6  | 5  | 7  | 4 | 180.000 | 10.460 | 2 |
| 24 | 8  | 7  | 9  | 4 | 180.000 | 10.460 | 2 |
| 23 | 7  | 6  | 8  | 4 | 180.000 | 10.460 | 2 |
| 27 | 15 | 13 | 16 | 4 | 180.000 | 10.460 | 2 |
| 28 | 16 | 15 | 17 | 4 | 180.000 | 10.460 | 2 |
| 29 | 17 | 16 | 18 | 4 | 180.000 | 10.460 | 2 |
| 25 | 9  | 8  | 10 | 4 | 180.000 | 10.460 | 2 |
| 11 | 10 | 5  | 9  | 4 | 180.000 | 10.460 | 2 |

[ dihedrals ]

; PROPER DIHEDRAL ANGLES

| ; ai | aj | ak | al | funct | c0     | c1    | c2      | c3     | c4     | c5    |
|------|----|----|----|-------|--------|-------|---------|--------|--------|-------|
| 8    | 9  | 10 | 5  | 3     | 30.334 | 0.000 | -30.334 | -0.000 | -0.000 | 0.000 |
| 9    | 10 | 5  | 6  | 3     | 30.334 | 0.000 | -30.334 | -0.000 | -0.000 | 0.000 |
| 8    | 7  | 6  | 5  | 3     | 30.334 | 0.000 | -30.334 | -0.000 | -0.000 | 0.000 |
| 9    | 8  | 7  | 6  | 3     | 30.334 | 0.000 | -30.334 | -0.000 | -0.000 | 0.000 |
| 18   | 12 | 13 | 15 | 3     | 30.334 | 0.000 | -30.334 | -0.000 | -0.000 | 0.000 |
| 10   | 5  | 6  | 7  | 3     | 30.334 | 0.000 | -30.334 | -0.000 | -0.000 | 0.000 |
| 16   | 17 | 18 | 12 | 3     | 30.334 | 0.000 | -30.334 | -0.000 | -0.000 | 0.000 |
| 10   | 9  | 8  | 7  | 3     | 30.334 | 0.000 | -30.334 | -0.000 | -0.000 | 0.000 |
| 18   | 17 | 16 | 15 | 3     | 30.334 | 0.000 | -30.334 | -0.000 | -0.000 | 0.000 |
| 16   | 15 | 13 | 12 | 3     | 30.334 | 0.000 | -30.334 | -0.000 | -0.000 | 0.000 |
| 17   | 16 | 15 | 13 | 3     | 30.334 | 0.000 | -30.334 | -0.000 | -0.000 | 0.000 |
| 17   | 18 | 12 | 13 | 3     | 30.334 | 0.000 | -30.334 | -0.000 | -0.000 | 0.000 |
| 9    | 10 | 5  | 4  | 3     | 30.334 | 0.000 | -30.334 | -0.000 | -0.000 | 0.000 |
| 7    | 6  | 5  | 4  | 3     | 30.334 | 0.000 | -30.334 | -0.000 | -0.000 | 0.000 |
| 16   | 15 | 13 | 14 | 3     | 30.334 | 0.000 | -30.334 | -0.000 | -0.000 | 0.000 |
| 18   | 12 | 13 | 14 | 3     | 30.334 | 0.000 | -30.334 | -0.000 | -0.000 | 0.000 |

|    |    |    |    |   |        |       |         |        |        |       |
|----|----|----|----|---|--------|-------|---------|--------|--------|-------|
| 17 | 18 | 12 | 11 | 3 | 30.334 | 0.000 | -30.334 | -0.000 | -0.000 | 0.000 |
| 15 | 13 | 12 | 11 | 3 | 30.334 | 0.000 | -30.334 | -0.000 | -0.000 | 0.000 |
| 10 | 5  | 4  | 2  | 3 | 0.000  | 0.000 | 0.000   | -0.000 | -0.000 | 0.000 |
| 6  | 5  | 4  | 2  | 3 | 0.000  | 0.000 | 0.000   | -0.000 | -0.000 | 0.000 |
| 13 | 12 | 11 | 10 | 3 | 8.786  | 0.000 | -8.786  | -0.000 | -0.000 | 0.000 |
| 18 | 12 | 11 | 10 | 3 | 8.786  | 0.000 | -8.786  | -0.000 | -0.000 | 0.000 |
| 5  | 4  | 2  | 3  | 3 | 2.284  | 0.000 | -2.284  | -0.000 | -0.000 | 0.000 |
| 5  | 4  | 2  | 1  | 3 | 2.284  | 0.000 | -2.284  | -0.000 | -0.000 | 0.000 |
| 12 | 11 | 10 | 5  | 3 | 8.786  | 0.000 | -8.786  | -0.000 | -0.000 | 0.000 |
| 12 | 11 | 10 | 9  | 3 | 8.786  | 0.000 | -8.786  | -0.000 | -0.000 | 0.000 |
| 19 | 18 | 12 | 13 | 3 | 30.334 | 0.000 | -30.334 | -0.000 | -0.000 | 0.000 |
| 19 | 18 | 17 | 16 | 3 | 30.334 | 0.000 | -30.334 | -0.000 | -0.000 | 0.000 |
| 19 | 18 | 12 | 11 | 3 | 30.334 | 0.000 | -30.334 | -0.000 | -0.000 | 0.000 |
| 14 | 13 | 12 | 11 | 3 | 30.334 | 0.000 | -30.334 | -0.000 | -0.000 | 0.000 |
| 26 | 11 | 12 | 13 | 3 | 8.494  | 0.000 | -8.494  | -0.000 | -0.000 | 0.000 |
| 26 | 11 | 10 | 9  | 3 | 8.494  | 0.000 | -8.494  | -0.000 | -0.000 | 0.000 |
| 26 | 11 | 12 | 18 | 3 | 8.494  | 0.000 | -8.494  | -0.000 | -0.000 | 0.000 |
| 26 | 11 | 10 | 5  | 3 | 8.494  | 0.000 | -8.494  | -0.000 | -0.000 | 0.000 |
| 24 | 8  | 7  | 6  | 3 | 30.334 | 0.000 | -30.334 | -0.000 | -0.000 | 0.000 |
| 24 | 8  | 9  | 10 | 3 | 30.334 | 0.000 | -30.334 | -0.000 | -0.000 | 0.000 |
| 22 | 6  | 5  | 10 | 3 | 30.334 | 0.000 | -30.334 | -0.000 | -0.000 | 0.000 |
| 23 | 7  | 6  | 5  | 3 | 30.334 | 0.000 | -30.334 | -0.000 | -0.000 | 0.000 |
| 27 | 15 | 13 | 12 | 3 | 30.334 | 0.000 | -30.334 | -0.000 | -0.000 | 0.000 |
| 22 | 6  | 7  | 8  | 3 | 30.334 | 0.000 | -30.334 | -0.000 | -0.000 | 0.000 |
| 29 | 17 | 16 | 15 | 3 | 30.334 | 0.000 | -30.334 | -0.000 | -0.000 | 0.000 |
| 28 | 16 | 15 | 13 | 3 | 30.334 | 0.000 | -30.334 | -0.000 | -0.000 | 0.000 |
| 25 | 9  | 8  | 7  | 3 | 30.334 | 0.000 | -30.334 | -0.000 | -0.000 | 0.000 |
| 23 | 7  | 8  | 9  | 3 | 30.334 | 0.000 | -30.334 | -0.000 | -0.000 | 0.000 |
| 29 | 17 | 18 | 12 | 3 | 30.334 | 0.000 | -30.334 | -0.000 | -0.000 | 0.000 |

|    |    |    |    |   |        |       |         |        |        |       |
|----|----|----|----|---|--------|-------|---------|--------|--------|-------|
| 28 | 16 | 17 | 18 | 3 | 30.334 | 0.000 | -30.334 | -0.000 | -0.000 | 0.000 |
| 25 | 9  | 10 | 5  | 3 | 30.334 | 0.000 | -30.334 | -0.000 | -0.000 | 0.000 |
| 27 | 15 | 16 | 17 | 3 | 30.334 | 0.000 | -30.334 | -0.000 | -0.000 | 0.000 |
| 22 | 6  | 5  | 4  | 3 | 30.334 | 0.000 | -30.334 | -0.000 | -0.000 | 0.000 |
| 27 | 15 | 13 | 14 | 3 | 30.334 | 0.000 | -30.334 | -0.000 | -0.000 | 0.000 |
| 29 | 17 | 18 | 19 | 3 | 30.334 | 0.000 | -30.334 | -0.000 | -0.000 | 0.000 |
| 24 | 8  | 7  | 23 | 3 | 30.334 | 0.000 | -30.334 | -0.000 | -0.000 | 0.000 |
| 29 | 17 | 16 | 28 | 3 | 30.334 | 0.000 | -30.334 | -0.000 | -0.000 | 0.000 |
| 28 | 16 | 15 | 27 | 3 | 30.334 | 0.000 | -30.334 | -0.000 | -0.000 | 0.000 |
| 25 | 9  | 8  | 24 | 3 | 30.334 | 0.000 | -30.334 | -0.000 | -0.000 | 0.000 |
| 23 | 7  | 6  | 22 | 3 | 30.334 | 0.000 | -30.334 | -0.000 | -0.000 | 0.000 |
| 25 | 9  | 10 | 11 | 3 | 30.334 | 0.000 | -30.334 | -0.000 | -0.000 | 0.000 |
| 21 | 4  | 2  | 1  | 3 | 0.000  | 0.000 | 0.000   | -0.000 | -0.000 | 0.000 |
| 20 | 4  | 2  | 1  | 3 | 0.000  | 0.000 | 0.000   | -0.000 | -0.000 | 0.000 |
| 20 | 4  | 2  | 3  | 3 | 0.000  | 0.000 | 0.000   | -0.000 | -0.000 | 0.000 |
| 21 | 4  | 2  | 3  | 3 | 0.000  | 0.000 | 0.000   | -0.000 | -0.000 | 0.000 |
| 21 | 4  | 5  | 6  | 3 | 0.000  | 0.000 | 0.000   | -0.000 | -0.000 | 0.000 |
| 20 | 4  | 5  | 6  | 3 | 0.000  | 0.000 | 0.000   | -0.000 | -0.000 | 0.000 |
| 20 | 4  | 5  | 10 | 3 | 0.000  | 0.000 | 0.000   | -0.000 | -0.000 | 0.000 |
| 21 | 4  | 5  | 10 | 3 | 0.000  | 0.000 | 0.000   | -0.000 | -0.000 | 0.000 |
| 11 | 10 | 9  | 8  | 3 | 30.334 | 0.000 | -30.334 | -0.000 | -0.000 | 0.000 |
| 11 | 10 | 5  | 6  | 3 | 30.334 | 0.000 | -30.334 | -0.000 | -0.000 | 0.000 |
| 11 | 10 | 5  | 4  | 3 | 30.334 | 0.000 | -30.334 | -0.000 | -0.000 | 0.000 |

[ pairs ]

|   |   |   |
|---|---|---|
| 1 | 5 | 1 |
| 3 | 5 | 1 |
| 2 | 6 | 1 |
| 4 | 7 | 1 |

|    |    |   |
|----|----|---|
| 2  | 10 | 1 |
| 5  | 8  | 1 |
| 4  | 9  | 1 |
| 6  | 9  | 1 |
| 4  | 11 | 1 |
| 7  | 10 | 1 |
| 6  | 11 | 1 |
| 5  | 12 | 1 |
| 8  | 11 | 1 |
| 9  | 12 | 1 |
| 1  | 20 | 1 |
| 1  | 21 | 1 |
| 10 | 13 | 1 |
| 3  | 20 | 1 |
| 3  | 21 | 1 |
| 11 | 14 | 1 |
| 11 | 15 | 1 |
| 6  | 20 | 1 |
| 4  | 22 | 1 |
| 6  | 21 | 1 |
| 12 | 16 | 1 |
| 11 | 17 | 1 |
| 10 | 18 | 1 |
| 5  | 23 | 1 |
| 14 | 16 | 1 |
| 13 | 17 | 1 |
| 11 | 19 | 1 |
| 10 | 20 | 1 |
| 8  | 22 | 1 |

|    |    |   |
|----|----|---|
| 6  | 24 | 1 |
| 5  | 25 | 1 |
| 10 | 21 | 1 |
| 5  | 26 | 1 |
| 14 | 18 | 1 |
| 13 | 19 | 1 |
| 10 | 22 | 1 |
| 9  | 23 | 1 |
| 7  | 25 | 1 |
| 15 | 18 | 1 |
| 10 | 24 | 1 |
| 16 | 19 | 1 |
| 9  | 26 | 1 |
| 11 | 25 | 1 |
| 13 | 26 | 1 |
| 12 | 27 | 1 |
| 14 | 27 | 1 |
| 13 | 28 | 1 |
| 12 | 29 | 1 |
| 18 | 26 | 1 |
| 17 | 27 | 1 |
| 15 | 29 | 1 |
| 22 | 23 | 1 |
| 18 | 28 | 1 |
| 23 | 24 | 1 |
| 19 | 29 | 1 |
| 24 | 25 | 1 |
| 27 | 28 | 1 |
| 28 | 29 | 1 |

```
; Include Position restraint file
```

```
#ifdef POSRES
```

```
#include "posre.itp"
```

```
#endif
```

## Section S2. Structure of the diclofenac anion hydrated with two water molecules

|    |           |           |           |
|----|-----------|-----------|-----------|
| 6  | 0.783137  | 2.118104  | -0.065981 |
| 6  | -0.326020 | 1.306058  | 0.263028  |
| 7  | -0.501816 | 0.084368  | -0.423653 |
| 6  | -2.662649 | -2.837553 | 0.461681  |
| 6  | -3.904148 | -2.396357 | 0.011847  |
| 6  | -4.027976 | -1.141284 | -0.579912 |
| 6  | -2.902255 | -0.339457 | -0.722022 |
| 6  | -1.629438 | -0.727293 | -0.258066 |
| 6  | -1.558167 | -2.003040 | 0.334666  |
| 6  | -1.227849 | 1.725758  | 1.250195  |
| 6  | -1.047428 | 2.940983  | 1.907630  |
| 6  | 0.044464  | 3.750008  | 1.596300  |
| 6  | 0.945272  | 3.326031  | 0.617597  |
| 6  | 1.774190  | 1.707291  | -1.122748 |
| 6  | 2.803320  | 0.639595  | -0.710428 |
| 8  | 2.728269  | 0.125556  | 0.441779  |
| 8  | 3.670194  | 0.337286  | -1.581207 |
| 1  | 0.370330  | -0.439019 | -0.583892 |
| 1  | -2.550254 | -3.817844 | 0.925656  |
| 1  | -4.777770 | -3.034876 | 0.117049  |
| 1  | -4.991228 | -0.789935 | -0.950797 |
| 17 | -3.082902 | 1.204045  | -1.551342 |
| 17 | -0.007519 | -2.573426 | 0.957482  |
| 1  | -2.073069 | 1.093484  | 1.509220  |
| 1  | -1.760837 | 3.247265  | 2.669823  |
| 1  | 0.194262  | 4.698993  | 2.105459  |
| 1  | 1.798976  | 3.952370  | 0.364258  |

|   |          |           |           |
|---|----------|-----------|-----------|
| 1 | 2.353684 | 2.594130  | -1.466731 |
| 1 | 1.249074 | 1.302694  | -2.022607 |
| 8 | 3.858158 | -2.273612 | 1.178307  |
| 1 | 3.431824 | -1.429051 | 0.898660  |
| 1 | 3.190669 | -2.966113 | 1.001372  |
| 8 | 5.622800 | -1.586316 | -1.029709 |
| 1 | 4.947164 | -0.896487 | -1.212657 |
| 1 | 5.244965 | -2.063089 | -0.269706 |



Section S3. Structure of the diclofenac anion hydrated with three water molecules

|    |           |           |           |
|----|-----------|-----------|-----------|
| 6  | 0.106570  | 2.408248  | 0.083297  |
| 6  | -0.797132 | 1.353879  | 0.346440  |
| 7  | -0.757438 | 0.204272  | -0.472173 |
| 6  | -2.230137 | -3.179939 | 0.135755  |
| 6  | -3.557309 | -2.961445 | -0.223280 |
| 6  | -3.964729 | -1.703793 | -0.662724 |
| 6  | -3.034345 | -0.675158 | -0.745436 |
| 6  | -1.686589 | -0.837199 | -0.367627 |
| 6  | -1.326231 | -2.125470 | 0.073007  |
| 6  | -1.712595 | 1.468089  | 1.401503  |
| 6  | -1.747814 | 2.615789  | 2.190716  |
| 6  | -0.860279 | 3.662399  | 1.944441  |
| 6  | 0.055436  | 3.542830  | 0.897327  |
| 6  | 1.107877  | 2.323451  | -1.038391 |
| 6  | 2.351311  | 1.457526  | -0.769220 |
| 8  | 2.450233  | 0.849787  | 0.333131  |
| 8  | 3.209764  | 1.414543  | -1.699946 |
| 1  | 0.191666  | -0.105665 | -0.723556 |
| 1  | -1.896152 | -4.159070 | 0.480247  |
| 1  | -4.275997 | -3.775235 | -0.166318 |
| 1  | -4.997608 | -1.522852 | -0.961390 |
| 17 | -3.568991 | 0.876982  | -1.384061 |
| 17 | 0.338228  | -2.426243 | 0.576805  |
| 1  | -2.397668 | 0.650190  | 1.608828  |
| 1  | -2.467263 | 2.682986  | 3.004118  |
| 1  | -0.879663 | 4.560957  | 2.556371  |
| 1  | 0.750623  | 4.355855  | 0.694879  |

|   |          |           |           |
|---|----------|-----------|-----------|
| 1 | 1.479486 | 3.341888  | -1.295368 |
| 1 | 0.634463 | 1.915385  | -1.964732 |
| 8 | 4.402075 | -1.014733 | 0.814584  |
| 1 | 3.698498 | -0.341450 | 0.652361  |
| 1 | 4.957669 | -0.947291 | 0.014256  |
| 8 | 5.398831 | -0.253440 | -1.722587 |
| 1 | 4.641409 | 0.380761  | -1.711752 |
| 1 | 6.201652 | 0.302403  | -1.776809 |
| 8 | 3.511452 | -3.553084 | 1.482102  |
| 1 | 2.784631 | -3.426744 | 2.122451  |
| 1 | 3.796247 | -2.644401 | 1.241847  |

Section S4. Structure of dimer of the diclofenac anion hydrated with four water molecules.

|    |           |           |           |
|----|-----------|-----------|-----------|
| 6  | 3.636398  | 1.865532  | -0.055953 |
| 6  | 2.883020  | 0.704119  | -0.334353 |
| 7  | 3.116537  | -0.461363 | 0.431473  |
| 6  | 1.858024  | -3.934274 | -0.163390 |
| 6  | 0.563140  | -3.835217 | 0.338472  |
| 6  | 0.108732  | -2.629798 | 0.868160  |
| 6  | 0.960727  | -1.533666 | 0.899773  |
| 6  | 2.269796  | -1.573856 | 0.379750  |
| 6  | 2.679436  | -2.812491 | -0.148244 |
| 6  | 1.920934  | 0.723435  | -1.351167 |
| 6  | 1.686102  | 1.881834  | -2.086826 |
| 6  | 2.423291  | 3.035088  | -1.825230 |
| 6  | 3.390568  | 3.010822  | -0.818796 |
| 6  | 4.674642  | 1.878800  | 1.033762  |
| 6  | 5.991700  | 1.141003  | 0.728559  |
| 8  | 6.116839  | 0.554054  | -0.389076 |
| 8  | 6.873522  | 1.160711  | 1.629246  |
| 1  | 4.111898  | -0.691837 | 0.557420  |
| 1  | 2.227790  | -4.870677 | -0.581935 |
| 1  | -0.094378 | -4.700658 | 0.317382  |
| 1  | -0.900633 | -2.538714 | 1.268796  |
| 17 | 0.374891  | -0.049006 | 1.638655  |
| 17 | 4.301744  | -2.953406 | -0.832453 |
| 1  | 1.357823  | -0.179752 | -1.568283 |
| 1  | 0.923014  | 1.877951  | -2.860316 |
| 1  | 2.243190  | 3.946300  | -2.390249 |
| 1  | 3.967223  | 3.909027  | -0.604455 |

|    |           |           |           |
|----|-----------|-----------|-----------|
| 1  | 4.268779  | 1.414968  | 1.965881  |
| 1  | 4.946344  | 2.927632  | 1.291685  |
| 6  | -4.037764 | -0.847674 | -1.923858 |
| 6  | -3.038137 | -0.075753 | -1.289131 |
| 7  | -3.428333 | 1.028045  | -0.497696 |
| 6  | -1.454756 | 2.847476  | 2.108391  |
| 6  | -0.661160 | 3.671139  | 1.314631  |
| 6  | -0.786288 | 3.636577  | -0.071699 |
| 6  | -1.711040 | 2.777549  | -0.651960 |
| 6  | -2.507756 | 1.895081  | 0.103648  |
| 6  | -2.346342 | 1.972033  | 1.500250  |
| 6  | -1.688916 | -0.411147 | -1.458499 |
| 6  | -1.318479 | -1.496273 | -2.247905 |
| 6  | -2.292538 | -2.268738 | -2.877859 |
| 6  | -3.637474 | -1.935585 | -2.704519 |
| 6  | -5.500425 | -0.525640 | -1.766366 |
| 6  | -6.151568 | -0.962638 | -0.441696 |
| 8  | -7.388666 | -0.724080 | -0.324714 |
| 8  | -5.436660 | -1.517564 | 0.440719  |
| 1  | -4.275637 | 0.864391  | 0.062969  |
| 1  | -1.366486 | 2.861596  | 3.194944  |
| 1  | 0.055280  | 4.344915  | 1.777790  |
| 1  | -0.178371 | 4.281179  | -0.704921 |
| 17 | -1.905815 | 2.830040  | -2.401321 |
| 17 | -3.283224 | 0.890905  | 2.533863  |
| 1  | -0.926889 | 0.172091  | -0.954449 |
| 1  | -0.264110 | -1.741896 | -2.351708 |
| 1  | -2.013004 | -3.120181 | -3.493590 |
| 1  | -4.406796 | -2.531096 | -3.193243 |

|   |           |           |           |
|---|-----------|-----------|-----------|
| 1 | -6.086620 | -1.006552 | -2.582536 |
| 1 | -5.678324 | 0.573920  | -1.855168 |
| 8 | 7.942794  | -1.452665 | -0.560707 |
| 1 | 7.284300  | -0.714176 | -0.502779 |
| 1 | 7.407677  | -2.264566 | -0.672028 |
| 8 | 9.293302  | -1.257051 | 1.880816  |
| 1 | 8.824390  | -0.510525 | 2.302451  |
| 1 | 8.833719  | -1.365951 | 1.021922  |
| 8 | -6.087646 | -1.764887 | 3.094259  |
| 1 | -5.837953 | -1.651624 | 2.145794  |
| 1 | -5.593658 | -1.070568 | 3.574395  |
| 8 | -8.711478 | -1.149606 | 2.110702  |
| 1 | -8.270935 | -1.015393 | 1.243292  |
| 1 | -7.963444 | -1.359368 | 2.698216  |

Section S5. Structure of dimer of the diclofenac anion hydrated with six water molecules.

|    |           |           |           |
|----|-----------|-----------|-----------|
| 6  | 3.459901  | 2.064916  | 0.129144  |
| 6  | 2.774829  | 0.901085  | -0.284209 |
| 7  | 2.965116  | -0.296759 | 0.441281  |
| 6  | 1.784607  | -3.723080 | -0.503352 |
| 6  | 0.470472  | -3.681681 | -0.045754 |
| 6  | -0.026026 | -2.526311 | 0.553160  |
| 6  | 0.807172  | -1.425956 | 0.703560  |
| 6  | 2.140173  | -1.411983 | 0.248158  |
| 6  | 2.588215  | -2.595939 | -0.365876 |
| 6  | 1.914938  | 0.954094  | -1.388492 |
| 6  | 1.721864  | 2.144683  | -2.084346 |
| 6  | 2.402699  | 3.297045  | -1.696425 |
| 6  | 3.264531  | 3.241869  | -0.599064 |
| 6  | 4.348403  | 2.048188  | 1.343988  |
| 6  | 5.692750  | 1.316562  | 1.204960  |
| 8  | 6.048580  | 0.886818  | 0.072216  |
| 8  | 6.371116  | 1.198472  | 2.269207  |
| 1  | 3.973246  | -0.536863 | 0.627321  |
| 1  | 2.183947  | -4.617408 | -0.982305 |
| 1  | -0.171534 | -4.551289 | -0.161325 |
| 1  | -1.053974 | -2.477395 | 0.911392  |
| 17 | 0.164586  | 0.001364  | 1.504696  |
| 17 | 4.232151  | -2.658172 | -1.008459 |
| 1  | 1.398943  | 0.051860  | -1.704367 |
| 1  | 1.036198  | 2.166186  | -2.927473 |
| 1  | 2.256351  | 4.232070  | -2.231453 |
| 1  | 3.789313  | 4.141157  | -0.281073 |

|    |           |           |           |
|----|-----------|-----------|-----------|
| 1  | 3.817811  | 1.574215  | 2.203963  |
| 1  | 4.590732  | 3.091799  | 1.653974  |
| 6  | -3.967436 | -0.821344 | -2.225080 |
| 6  | -3.020887 | 0.024002  | -1.600898 |
| 7  | -3.484076 | 1.112584  | -0.831011 |
| 6  | -1.667498 | 2.936593  | 1.887516  |
| 6  | -0.886834 | 3.816316  | 1.142913  |
| 6  | -0.963009 | 3.811713  | -0.247115 |
| 6  | -1.828742 | 2.927897  | -0.879064 |
| 6  | -2.615256 | 1.995421  | -0.174469 |
| 6  | -2.500336 | 2.039453  | 1.228789  |
| 6  | -1.652512 | -0.230474 | -1.764160 |
| 6  | -1.213972 | -1.297794 | -2.542929 |
| 6  | -2.135361 | -2.135232 | -3.168580 |
| 6  | -3.498960 | -1.887538 | -2.996752 |
| 6  | -5.445946 | -0.599117 | -2.048624 |
| 6  | -6.035206 | -1.065960 | -0.705155 |
| 8  | -7.234193 | -0.725793 | -0.475009 |
| 8  | -5.320856 | -1.759923 | 0.070534  |
| 1  | -4.367152 | 0.916864  | -0.292231 |
| 1  | -1.613802 | 2.924428  | 2.976310  |
| 1  | -0.217131 | 4.508471  | 1.647072  |
| 1  | -0.361773 | 4.496697  | -0.843167 |
| 17 | -1.956279 | 3.010832  | -2.634020 |
| 17 | -3.408466 | 0.887794  | 2.211210  |
| 1  | -0.927431 | 0.399644  | -1.261950 |
| 1  | -0.146437 | -1.481164 | -2.640115 |
| 1  | -1.801230 | -2.973300 | -3.775326 |
| 1  | -4.229064 | -2.537964 | -3.475542 |

|   |           |           |           |
|---|-----------|-----------|-----------|
| 1 | -6.009403 | -1.152162 | -2.837353 |
| 1 | -5.710240 | 0.477480  | -2.166602 |
| 8 | 8.152339  | -0.879406 | -0.197644 |
| 1 | 7.402127  | -0.242063 | -0.137328 |
| 1 | 8.461586  | -0.936524 | 0.727765  |
| 8 | 8.508322  | -0.490972 | 2.569756  |
| 1 | 7.728225  | 0.110134  | 2.483760  |
| 1 | 8.227237  | -1.194222 | 3.188648  |
| 8 | 7.595517  | -3.350344 | -1.316447 |
| 1 | 7.750132  | -2.477630 | -0.892917 |
| 1 | 6.972210  | -3.809910 | -0.721396 |
| 8 | -6.086197 | -2.296475 | 2.657974  |
| 1 | -5.792851 | -2.119300 | 1.732787  |
| 1 | -6.996503 | -1.941522 | 2.667246  |
| 8 | -8.509805 | -1.046180 | 1.934841  |
| 1 | -8.083424 | -0.962951 | 1.046899  |
| 1 | -9.306349 | -1.594915 | 1.790196  |
| 8 | -4.475961 | -1.300051 | 4.683302  |
| 1 | -5.014904 | -1.635852 | 3.934047  |
| 1 | -3.562337 | -1.264000 | 4.339474  |
